# Supplementary material for: Inhibition of HDAC6 Attenuates Diabetes-Induced Retinal Redox Imbalance and Microangiopathy
Source: PubMed Central journal article supplement (PMC7402090; doi:10.3390/antiox9070599), 2020-07-09
Supplement: antioxidants-09-00599-s001.pdf [file antioxidants-09-00599-s001.pdf]

## Supplementary data

**Table S1. Demographics and clinical history of human *postmortem* retinal donors.**

| Donors | Experimental Group   | Age | Sex | Significant Medical Conditions                            | Ocular History |
|--------|----------------------|-----|-----|-----------------------------------------------------------|----------------|
| P-1    | Control/non-diabetic | 51  | M   | HTN, non-invasive eye surgery                             |                |
| P-2    | Control/non-diabetic | 38  | M   |                                                           |                |
| P-3    | Control/non-diabetic | 52  | M   | HTN, high cholesterol                                     |                |
| P-4    | Control/non-diabetic | 52  | M   |                                                           |                |
| P-5    | Control/non-diabetic | 56  | F   |                                                           |                |
| P-6    | Control/non-diabetic | 56  | M   | HTN, lupus                                                |                |
| P-7    | Control/non-diabetic | 48  | F   | Obesity, CAD                                              |                |
| P-8    | Control/non-diabetic | 68  | M   | Coronary artery bypass graft, HTN                         |                |
| P-9    | Diabetic             | 62  | F   | Dialysis, HTN, stroke                                     | DR             |
| P-10   | Diabetic             | 60  | F   | Obesity                                                   | DR, laser OS   |
| P-11   | Diabetic             | 67  | M   | IDDM 10 yrs, toe amputation, dialysis                     | DR, laser OS   |
| P-12   | Diabetic             | 71  | M   | IDDM, dialysis, Parkinson's Disease, altered mental state | DR, glaucoma   |
| P-13   | Diabetic             | 57  | F   | ESRD, IDDM 10yrs, obesity                                 | DR             |
| P-14   | Diabetic             | 49  | M   | Leg amputation                                            | DR             |
| P-15   | Diabetic             | 52  | M   | Dialysis                                                  | DR             |
| P-16   | Diabetic             | 68  | F   | Alzheimer's, right lung mass                              | DR             |

CAD, coronary artery disease

DR, diabetic retinopathy

HTN, hypertension

IDDM, insulin-dependent diabetes mellitus

NDDM, noninsulin-dependent diabetes mellitus

ESRD, end-stage renal disease

OS, oculus sinister (left eye)

Table S2. Biochemical parameters measured in the experimental rat groups.

| Experimental Groups | Body weight (g)         | Blood Glucose (mg/dl) | HbA1c (mmol/mol) | ALT (U/L)             | AST (U/L)             |
|---------------------|-------------------------|-----------------------|------------------|-----------------------|-----------------------|
| Control             | 298±5.0                 | 87.6±6.9              | 4.1±0.1          | 56±6                  | 115±5.6               |
| DB                  | 217.8±17.8**            | 492±76.4**            | 9±0.6*           | 101±13.8*             | 234±16.9*             |
| DB + TS             | 251.2±14.3 <sup>#</sup> | 447.8±67.1            | 7.8±0.5          | 79.6±9.9 <sup>#</sup> | 118.6±29 <sup>#</sup> |

\*p<0.001 and \*\*p<0.0001 vs. control and #p<0.05 vs. DB; n=6

HbA1c, Hemoglobin A1c

ALT , Alanine aminotransferase

AST, Aspartate aminotransferase

**Table S3. Primer sequences used in the study.**

| Genes                    | Forward                     | Reverse                    |
|--------------------------|-----------------------------|----------------------------|
| <i>Rattus norvegicus</i> |                             |                            |
| HDAC6                    | GGA AAA GGT CGC CAG AAA CTT | GGC CGG TTG AGG TCA TAG TT |
| GCLC                     | GCCGTCTTACAGGGGATGTT        | ACGCCTTCCTTCCCATTGAT       |
| GCLM                     | GTGGGCACAGGTAAAACCCAA       | ACTTGCCTCAGAGAGCAGTTC      |
| NQO 1                    | TGGCCAATTCAGAGTGGCATT       | AGAGTGGTGACTCCTCCCAG       |
| HO-1                     | CTGCTAGCCTGGTTCAAGATACT     | TAAATTCCCCTGACCACGGT       |
| HPRT-1                   | TGGATACAGGCCAGACTTTGT       | TGCCCGCTGTCTTTTAGGCT       |
| <i>Homo sapiens</i>      |                             |                            |
| HDAC6                    | GGAAAAGGTCGCCAGAACTT        | GGCCGGTTGAGGTCATAGTT       |
| 18s                      | GGCCCTGTAATTGGAATGAGTC      | CCAAGATCCAACACTACGAGCTT    |

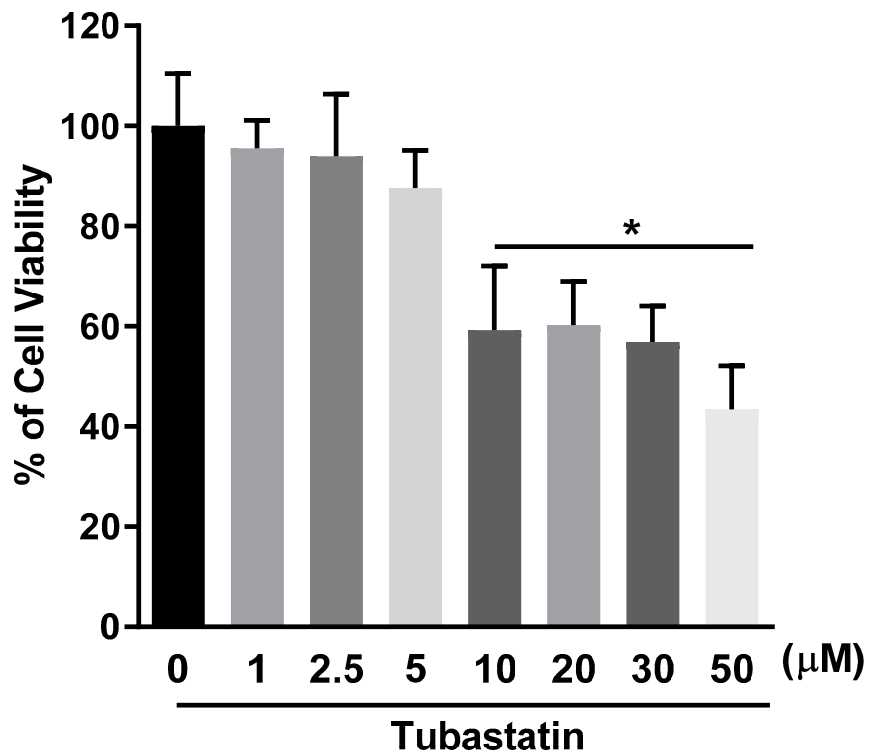

**Figure S1.** MTT Assay was performed to assess viability of HuREC cells in response to different concentrations of Tubastatin A (1-50 μM). Values are mean ± SEM for n=6. \*p<0.05 vs. 0 μM.
